# Supplementary material
Source: PubMed Central journal article supplement (PMC2673878)
Supplement: JCI37385sd.pdf [file JCI37385sd.pdf]

**Table S1: Inpatient Diet Composition**

| Diet Components (% of Energy)        | Inpatient Period |              |
|--------------------------------------|------------------|--------------|
|                                      | Baseline         | Intervention |
| Protein                              | 15.1 ± 0.0       | 15.0 ± 0.1   |
| Total fat                            | 30.0 ± 0.0       | 30.0 ± 0.1   |
| Saturated fat                        | 8.6 ± 0.8        | 8.4 ± 0.9    |
| Monounsaturated fat                  | 8.7 ± 0.1        | 9.7 ± 0.5    |
| Polyunsaturated fat                  | 9.7 ± 0.5        | 8.7 ± 0.2    |
| Total carbohydrate                   | 55.0 ± 0.0       | 55.0 ± 0.1   |
| Meal carbohydrate                    | 55.0 ± 0.0       | 30.0 ± 0.1   |
| Beverage sugar                       | 0                | 25.0 ± 0.0   |
| Meal sugar                           | 5.3 ± 0.9        | 4.3 ± 0.4    |
| Meal fructose (mono- & disaccharide) | 1.5 ± 0.2        | 1.2 ± 0.2    |
| Meal glucose (mono- & disaccharide)  | 2.9 ± 0.6        | 2.3 ± 0.2    |
| Galactose                            | 0.9 ± 0.2        | 0.8 ± 0.2    |
| Total fiber (g/1000 kcals)           | 8.8 ± 1.2        | 6.7 ± 0.6    |
| Cholesterol (mg/1000 kcals)          | 83.0 ± 29.5      | 99.4 ± 25.8  |

Mean ± SEM

**Table S2: Outpatient energy, fat, added sugar and alcohol consumption based on 24-h food intake recalls**

| Variable                                                                    | Glucose (n = 14)        | Fructose (n = 14)       | Factor | P value <sup>A</sup> |
|-----------------------------------------------------------------------------|-------------------------|-------------------------|--------|----------------------|
| Outpatient energy intake<br>(% difference compared with energy requirement) | +8.4 ± 2.5 <sup>C</sup> | +7.4 ± 3.2 <sup>B</sup> | Sugar  | 0.76                 |
|                                                                             |                         |                         | Gender | 0.26                 |
|                                                                             |                         |                         | MSRF   | 0.80                 |
| Outpatient fat intake<br>(% of energy consumed)                             | 30.4 ± 1.2              | 28.4 ± 1.0              | Sugar  | 0.31                 |
|                                                                             |                         |                         | Gender | 0.18                 |
|                                                                             |                         |                         | MSRF   | 0.37                 |
| Outpatient added sugar intake--includes beverage<br>(% of energy consumed)  | 28.5 ± 2.5              | 30.3 ± 1.0              | Sugar  | 0.68                 |
|                                                                             |                         |                         | Gender | 0.70                 |
|                                                                             |                         |                         | MSRF   | 0.80                 |
| Outpatient alcohol intake<br>% of energy consumed                           | 0.9 ± 0.5               | 1.3 ± 0.7               | Sugar  | 0.61                 |
|                                                                             |                         |                         | Gender | 0.58                 |
|                                                                             |                         |                         | MSRF   | 0.97                 |

<sup>A</sup>GLM 3-factor (sugar, gender, MSRF) ANOVA

<sup>B</sup> $P < 0.05$ , <sup>C</sup> $P < 0.01$ , paired t test, outpatient energy intake vs calculated energy requirement.

Mean ± SEM

**Table S3: Body weight and body composition before and after 10 weeks consumption of glucose- or fructose-sweetened beverages**

| Variable                       | Sugar (n)                 | 0 wk<br>(Baseline) | 10 wk                   | Factor         | P value <sup>A</sup> |
|--------------------------------|---------------------------|--------------------|-------------------------|----------------|----------------------|
| Body Weight<br>(kg)            | Glucose (15)              | 85.9 ± 2.7         | 87.5 ± 2.9 <sup>C</sup> | Sugar          | 0.47                 |
|                                | Fructose (17)             | 85.7 ± 2.6         | 87.0 ± 2.6 <sup>D</sup> | Gender<br>MSRF | 0.068<br>0.76        |
| Total Body Fat<br>(kg)         | Glucose (15)              | 30.7 ± 2.2         | 31.6 ± 2.2 <sup>D</sup> | Sugar          | 0.60                 |
|                                | Fructose (17)             | 28.9 ± 2.2         | 29.6 ± 2.1 <sup>C</sup> | Gender<br>MSRF | 0.020<br>0.93        |
| Waist<br>Circumference<br>(cm) | Glucose (15)              | 94.6 ± 2.6         | 96.2 ± 2.7 <sup>B</sup> | Sugar          | 0.81                 |
|                                | Fructose (17)             | 94.7 ± 2.7         | 96.4 ± 2.6 <sup>D</sup> | Gender<br>MSRF | 0.25<br>0.12         |
| Total Abdominal Fat<br>(cc)    | Glucose (14) <sup>G</sup> | 765 ± 57           | 794 ± 53                | Sugar          | 0.36                 |
|                                | Fructose (17)             | 683 ± 55           | 731 ± 51 <sup>B</sup>   | Gender<br>MSRF | 0.11<br>0.61         |
| Extra-Abdominal Fat<br>(cc)    | Glucose (14)              | 522 ± 59           | 544 ± 61 <sup>B</sup>   | Sugar          | 0.64                 |
|                                | Fructose (17)             | 476 ± 43           | 495 ± 38                | Gender<br>MSRF | 0.82<br>0.40         |
| Intra-Abdominal Fat<br>(cc)    | Glucose (14)              | 243 ± 21           | 250 ± 23                | Sugar          | 0.059                |
|                                | Glucose/Men (7)           | 281 ± 38           | 291 ± 41                | Gender         | 0.049                |
|                                | Glucose/Women (7)         | 214 ± 18           | 219 ± 23                | MSRF           | 0.21                 |
|                                | Fructose (17)             | 207 ± 21           | 235 ± 25 <sup>C</sup>   |                |                      |
|                                | Fructose/Men (9)          | 195 ± 29           | 244 ± 36 <sup>E,F</sup> |                |                      |
|                                | Fructose/Women (8)        | 220 ± 33           | 226 ± 36                |                |                      |

<sup>A</sup>General linear model (GLM) 3-factor (sugar, gender, MSRF) ANOVA on 10 wk vs 0 wk %difference

<sup>B</sup> $P < 0.05$ , <sup>C</sup> $P < 0.01$ , <sup>D</sup> $P < 0.001$  paired  $t$  test, 10 wk vs 0 wk.

<sup>E</sup> $P = 0.048$  GLM gender-specific 2-factor (sugar, MSRF) ANOVA on 10 wk vs 0 wk %difference; Glucose/Men vs Fructose/Men.

<sup>F</sup> $P = 0.019$  GLM sugar-specific 2-factor (gender, MSRF) ANOVA on 10 wk vs 0 wk %difference; Fructose/Women vs Fructose/Men.

Mean ± SEM

**Table S4: Percent change of the natural log of gene expression in subcutaneous fat biopsied in the fasting state before and after 10 weeks of consuming glucose- or fructose-sweetened beverages.**

| Variable (n=glucose/fructose)                                 | Glucose      | Fructose    | Factor | P value <sup>A</sup> |
|---------------------------------------------------------------|--------------|-------------|--------|----------------------|
| Fatty acid desaturase 1<br>(n=15/16)                          | 65.3 ± 17.6  | -0.7 ± 11.8 | Sugar  | 0.0024               |
|                                                               |              |             | Gender | 0.14                 |
|                                                               |              |             | MSRF   | 0.27                 |
| Fatty acid desaturase 2<br>(n=15/16)                          | 53.4 ± 17.9  | 9.6 ± 9.2   | Sugar  | 0.025                |
|                                                               |              |             | Gender | 0.022                |
|                                                               |              |             | MSRF   | 0.76                 |
| Stearoyl-CoA desaturase-1<br>(n=15/16)                        | 54.0 ± 22.6  | -2.1 ± 10.0 | Sugar  | 0.017                |
|                                                               |              |             | Gender | 0.11                 |
|                                                               |              |             | MSRF   | 0.35                 |
| Fatty acid synthase<br>(n=15/16)                              | 23.9 ± 9.8   | 1.8 ± 7.0   | Sugar  | 0.057                |
|                                                               |              |             | Gender | 0.29                 |
|                                                               |              |             | MSRF   | 0.54                 |
| SREBP1c<br>(n=10/13)                                          | 1.5 ± 14.1   | -6.1 ± 12.7 | Sugar  | 0.36                 |
|                                                               |              |             | Gender | 0.64                 |
|                                                               |              |             | MSRF   | 0.33                 |
| Acyl CoA:diacylglycerol<br>acyltransferase 1<br>(n=10/13)     | -8.6 ± 13.4  | -3.6 ± 5.7  | Sugar  | 0.96                 |
|                                                               |              |             | Gender | 0.55                 |
|                                                               |              |             | MSRF   | 0.33                 |
| Acyl CoA:diacylglycerol<br>acyltransferase 2<br>(n=10/13)     | -9.9 ± 27.0  | -0.3 ± 6.8  | Sugar  | 0.92                 |
|                                                               |              |             | Gender | 0.14                 |
|                                                               |              |             | MSRF   | 0.18                 |
| PPAR $\gamma$<br>(n=10/13)                                    | -15.3 ± 9.2  | 5.8 ± 5.3   | Sugar  | 0.074                |
|                                                               |              |             | Gender | 0.55                 |
|                                                               |              |             | MSRF   | 0.16                 |
| Carbohydrate response element<br>binding protein<br>(n=10/13) | -14.1 ± 7.2  | 1.5 ± 6.1   | Sugar  | 0.14                 |
|                                                               |              |             | Gender | 0.30                 |
|                                                               |              |             | MSRF   | 0.35                 |
| Leptin<br>(n=10/13)                                           | -15.5 ± 11.9 | 9.4 ± 8.7   | Sugar  | 0.2                  |
|                                                               |              |             | Gender | 0.21                 |
|                                                               |              |             | MSRF   | 0.13                 |
| Adiponectin<br>(n=10/13)                                      | -13.4 ± 9.0  | -1.7 ± 6.8  | Sugar  | 0.39                 |
|                                                               |              |             | Gender | 0.85                 |
|                                                               |              |             | MSRF   | 0.45                 |
| TNF- $\alpha$<br>(n=15/16)                                    | 0.3 ± 13.4   | -12.8 ± 6.5 | Sugar  | 0.42                 |
|                                                               |              |             | Gender | 0.54                 |
|                                                               |              |             | MSRF   | 0.85                 |

<sup>A</sup>GLM 3-factor ANOVA on percent  $\Delta$  of the natural log of the expression, 0 vs 10wk.

**Table S5: Blood pressure before and after 2, 8, and 10 weeks consumption of glucose- or fructose-sweetened beverages**

| Variable             | Sugar (n)          | Complex Carb<br>0 wk | Sugar<br>2 wk | Sugar<br>8 wk | Sugar<br>10 wk | 2-way<br>Interactions         | P value                |
|----------------------|--------------------|----------------------|---------------|---------------|----------------|-------------------------------|------------------------|
| Preceding diet       |                    | Energy balance       | Ad libitum    | Ad libitum    | Energy balance |                               |                        |
| Systolic BP<br>mmHg  | Glucose (n=15)     | 122 ± 2              | 124 ± 3       | 123 ± 2       | 121 ± 2        | Sugar×t<br>Gender×t<br>MSRF×t | 0.64<br>0.013<br>0.68  |
|                      | Glucose/Men (7)    | 121 ± 2              | 129 ± 3       | 126 ± 2       | 121 ± 1        |                               |                        |
|                      | Glucose/Women (8)  | 123 ± 2              | 119 ± 3       | 120 ± 2       | 121 ± 3        |                               |                        |
|                      | Fructose (n=17)    | 120 ± 2              | 120 ± 2       | 119 ± 2       | 118 ± 2        |                               |                        |
|                      | Fructose/Men (9)   | 120 ± 2              | 122 ± 3       | 120 ± 3       | 120 ± 3        |                               |                        |
|                      | Fructose/Women (8) | 120 ± 3              | 118 ± 3       | 118 ± 3       | 115 ± 3        |                               |                        |
| Diastolic BP<br>mmHg | Glucose (n=15)     | 77 ± 1               | 79 ± 1        | 78 ± 1        | 79 ± 1         | Sugar×t<br>Gender×t<br>MSRF×t | 0.44<br>0.0013<br>0.27 |
|                      | Glucose/Men (7)    | 76 ± 2               | 81 ± 2        | 79 ± 1        | 77 ± 1         |                               |                        |
|                      | Glucose/Women (8)  | 79 ± 2               | 78 ± 2        | 77 ± 2        | 80 ± 2         |                               |                        |
|                      | Fructose (n=17)    | 76 ± 1               | 76 ± 2        | 75 ± 1        | 75 ± 1         |                               |                        |
|                      | Fructose/Men (9)   | 76 ± 1               | 77 ± 2        | 77 ± 1        | 76 ± 2         |                               |                        |
|                      | Fructose/Women (8) | 77 ± 3               | 76 ± 3        | 74 ± 2        | 73 ± 2         |                               |                        |

Mixed Procedures (PROC MIXED) 4-factor (sugar, time, gender, MSRF) Repeated Measures (RM) ANOVA

Mean ± SEM

**Table S6: Lipid & lipoprotein concentrations before and after 2, 8 & 10 weeks consumption of glucose- or fructose-sweetened beverages**

| Variable                        | Sugar (n)                                      | Complex Carb<br>0 wk         | Sugar<br>2 wk                           | Sugar<br>8 wk                             | Sugar<br>10 wk                                     | 2- and 3-way<br>Interactions                    | P value                                                                              |
|---------------------------------|------------------------------------------------|------------------------------|-----------------------------------------|-------------------------------------------|----------------------------------------------------|-------------------------------------------------|--------------------------------------------------------------------------------------|
|                                 |                                                |                              |                                         |                                           |                                                    |                                                 |                                                                                      |
| Fasting TG<br>(mg/dl)           | Glucose (n=15)<br>Fructose (n=17)              | 146 ± 17<br>144 ± 18         | 163 ± 19<br>147 ± 20                    | 149 ± 15<br>143 ± 18                      | 157 ± 16<br>145 ± 17                               | Sugar×t<br>Gender×t<br>MSRF×t                   | 0.44 <sup>B</sup><br>0.23 <sup>B</sup><br>0.030 <sup>B</sup>                         |
| 23-h TG AUC<br>(mg/dl•23h)      | Glucose (n=14) <sup>C</sup><br>Fructose (n=17) | 783 ± 118<br>808 ± 167       | 786 ± 160<br>1,530 ± 217 <sup>C</sup>   | 978 ± 151<br>1,541 ± 285 <sup>E</sup>     | 479 ± 150<br>1,241 ± 199 <sup>C</sup>              | Sugar×t<br>Gender×t<br>MSRF×t                   | 0.0011 <sup>B</sup><br>0.0095 <sup>B</sup><br>0.049 <sup>B</sup>                     |
| Mean 24-h [TG]<br>(mg/dl)       | Glucose (n=14) <sup>C</sup><br>Fructose (n=17) | 171 ± 20<br>163 ± 21         | 179 ± 18<br>194 ± 24                    | 178 ± 17<br>192 ± 24 <sup>F</sup>         | 170 ± 16<br>189 ± 21 <sup>D</sup>                  | Sugar×t<br>Gender×t<br>MSRF×t<br>Sugar×Gender×t | 0.0055 <sup>B</sup><br>0.19 <sup>B</sup><br>0.070 <sup>B</sup><br>0.029 <sup>B</sup> |
| Postprandial TG Peak<br>(mg/dl) | Glucose (n=15)<br>Fructose (n=17)              | 202.4 ± 24.6<br>211.1 ± 28.3 | 234.7 ± 21.7<br>295.5 ± 36.7            | 227.2 ± 20.5<br>282.7 ± 35.4 <sup>D</sup> | 214.2 ± 20.3<br>274.9 ± 31.1 <sup>F</sup>          | Sugar×t<br>Gender×t<br>MSRF×t                   | 0.0026 <sup>B</sup><br>0.13 <sup>B</sup><br>0.040 <sup>B</sup>                       |
| Fasting ApoB<br>(mg/dl)         | Glucose (n=15)<br>Fructose (n=17)              | 86 ± 6<br>79 ± 6             | 92 ± 7<br>97 ± 8                        | 90 ± 7<br>101 ± 9 <sup>F</sup>            | 87 ± 5<br>98 ± 6 <sup>F</sup>                      | Sugar×t<br>Gender×t<br>MSRF×t                   | <0.0001 <sup>B</sup><br>0.54 <sup>A</sup><br>0.83 <sup>B</sup>                       |
| Postprandial ApoB<br>(mg/dl)    | Glucose (n=15)<br>Fructose (n=17)              | 81 ± 6<br>74 ± 6             | 88 ± 6<br>92 ± 7 <sup>C</sup>           | 87 ± 6<br>95 ± 8 <sup>D</sup>             | 86 ± 6<br>92 ± 7 <sup>F</sup>                      | Sugar×t<br>Gender×t<br>MSRF×t                   | 0.043 <sup>B</sup><br>0.31 <sup>B</sup><br>0.34 <sup>B</sup>                         |
| ApoB/ApoA1                      | Glucose (n=15)<br>Fructose (n=17)              | 0.75 ± 0.07<br>0.63 ± 0.06   | 0.70 ± 0.05<br>0.75 ± 0.07 <sup>C</sup> | 0.72 ± 0.06<br>0.79 ± 0.07 <sup>D</sup>   | 0.75 ± 0.06<br>0.75 ± 0.06 <sup>D</sup>            | Sugar×t<br>Gender×t<br>MSRF×t                   | 0.0006 <sup>A</sup><br>0.78 <sup>A</sup><br>0.42 <sup>A</sup>                        |
| Fasting Cholesterol<br>(mg/dl)  | Glucose (n=15)<br>Fructose (n=17)              | 186 ± 8<br>186 ± 8           | 198 ± 9<br>209 ± 10 <sup>D</sup>        | 191 ± 10<br>217 ± 13 <sup>C</sup>         | 193 ± 8<br>205 ± 9 <sup>F</sup>                    | Sugar×t<br>Gender×t<br>MSRF×t                   | 0.036 <sup>A</sup><br>0.45 <sup>A</sup><br>0.89 <sup>A</sup>                         |
| Fasting LDL<br>(mg/dl)          | Glucose (n=15)<br>Fructose (n=17)              | 123.4 ± 5.9<br>115.3 ± 8.0   | 133.7 ± 6.9<br>130.4 ± 9.8              | 129.8 ± 7.7<br>137.0 ± 10.1 <sup>D</sup>  | 127.2 ± 6.6<br>131.5 ± 9.6 <sup>E</sup>            | Sugar×t<br>Gender×t<br>MSRF×t                   | 0.023 <sup>A</sup><br>0.90 <sup>A</sup><br>0.97 <sup>A</sup>                         |
| Fasting HDL<br>(mg/dl)          | Glucose (n=15)<br>Fructose (n=17)              | 39 ± 2<br>40 ± 3             | 41 ± 2<br>45 ± 3 <sup>C</sup>           | 42 ± 2<br>46 ± 3 <sup>D</sup>             | 38 ± 2<br>41 ± 2                                   | Sugar×t<br>Gender×t<br>MSRF×t                   | 0.085 <sup>A</sup><br>0.25 <sup>A</sup><br>0.21 <sup>A</sup>                         |
| Fasting ApoA1<br>(mg/dl)        | Glucose (n=15)<br>Fructose (n=17)              | 120 ± 6<br>133 ± 8           | 134 ± 6<br>135 ± 9                      | 129 ± 5<br>135 ± 10                       | 121 ± 6<br>138 ± 8                                 | Sugar×t<br>Gender×t<br>MSRF×t                   | 0.11 <sup>A</sup><br>0.93 <sup>A</sup><br>0.44 <sup>A</sup>                          |
| Fasting sdLDL<br>(mg/dl)        | Glucose (n=15)<br>Fructose (n=17)              | 29.9 ± 3.5<br>24.7 ± 2.7     | 26.7 ± 3.0<br>28.0 ± 3.1                | 27.9 ± 3.5<br>30.5 ± 3.4                  | 32.7 ± 3.3<br>34.8 ± 4.1 <sup>F</sup>              | Sugar×t<br>Gender×t<br>MSRF×t<br>Sugar×MSRF×t   | 0.022 <sup>A</sup><br>0.87 <sup>A</sup><br>0.031 <sup>A</sup><br>0.076 <sup>A</sup>  |
| Postprandial sdLDL<br>(mg/dl)   | Glucose (n=15)<br>Fructose (n=17)              | 21.7 ± 2.3<br>19.1 ± 2.3     | 20.3 ± 2.5<br>20.4 ± 2.7                | 20.9 ± 4.1<br>21.8 ± 3.2                  | 25.6 ± 2.4 <sup>C</sup><br>24.0 ± 3.2 <sup>D</sup> | Sugar×t<br>Gender×t<br>MSRF×t<br>Sugar×MSRF×t   | 0.34 <sup>A</sup><br>0.80 <sup>A</sup><br>0.45 <sup>A</sup><br>0.082 <sup>A</sup>    |
| Fasting oxidized LDL<br>(U/L)   | Glucose (n=15)<br>Fructose (n=17)              | 53.3 ± 3.0<br>50.8 ± 3.9     | 56.2 ± 3.2<br>55.3 ± 5.2                | 53.8 ± 4.0<br>55.1 ± 4.2                  | 53.0 ± 2.7<br>57.2 ± 4.3 <sup>D</sup>              | Sugar×t<br>Gender×t<br>MSRF×t                   | 0.022 <sup>A</sup><br>0.93 <sup>A</sup><br>0.97 <sup>A</sup>                         |
| Postprandial RLP-TG<br>(mg/dl)  | Glucose (n=15)<br>Fructose (n=17)              | 70.7 ± 11.4<br>82.6 ± 16.5   | 81.7 ± 10.7<br>133.4 ± 24.0             | 82.0 ± 11.2<br>136.4 ± 26.2 <sup>D</sup>  | 77.9 ± 10.6<br>128.6 ± 19.2 <sup>F</sup>           | Sugar×t<br>Gender×t<br>MSRF×t                   | 0.0001 <sup>B</sup><br>0.33 <sup>B</sup><br>0.15 <sup>B</sup>                        |
| Postprandial RLP-C<br>(mg/dl)   | Glucose (n=15)<br>Fructose (n=17)              | 10.1 ± 1.4<br>10.9 ± 1.6     | 11.0 ± 1.2<br>15.5 ± 2.5                | 11.5 ± 1.3<br>16.2 ± 2.5 <sup>D</sup>     | 10.3 ± 1.3<br>13.7 ± 1.7 <sup>F</sup>              | Sugar×t<br>Gender×t<br>MSRF×t<br>Sugar×Gender×t | 0.0013 <sup>B</sup><br>0.18 <sup>B</sup><br>0.080 <sup>B</sup><br>0.040 <sup>B</sup> |
| Mean 24-h [FFA]<br>(mEq/l)      | Glucose (n=14) <sup>G</sup><br>Fructose (n=17) | 0.27 ± 0.01<br>0.28 ± 0.02   | 0.29 ± 0.01<br>0.26 ± 0.01              | 0.28 ± 0.01<br>0.28 ± 0.02                | 0.29 ± 0.01<br>0.28 ± 0.02                         | Sugar×t<br>Gender×t<br>MSRF×t                   | 0.031 <sup>A</sup><br>0.22 <sup>A</sup><br>0.54 <sup>A</sup>                         |

<sup>A</sup>PROC MIXED 4-factor (sugar, time, gender, MSRF) RM ANOVA

<sup>B</sup>PROC MIXED 4-factor (sugar, time, gender, MSRF) RM ANOVA with previous day's energy intake (EI) as time-level covariable

<sup>C</sup>P < 0.05, <sup>D</sup>P < 0.01, <sup>E</sup>P < 0.001, <sup>F</sup>P < 0.0001 vs 0 wk, Tukeys multiple comparison tests<sup>A</sup> on LSmeans adjusted for previous day's EI<sup>B</sup>.

Mean ± SEM

**Table S7: Effects of MSRF on lipid and lipoprotein responses to fructose consumption**

| Variable                        | MSRF #<br>n=male/<br>female | Complex Carb<br>0 wk  | Fructose<br>2 wk  | Fructose<br>8 wk        | Fructose<br>10 wk         | %Δ<br>10 wk vs 0 wk | Factor or<br>Interaction | P value              |
|---------------------------------|-----------------------------|-----------------------|-------------------|-------------------------|---------------------------|---------------------|--------------------------|----------------------|
| Preceding diet                  |                             | Energy balance        | <i>Ad libitum</i> | <i>Ad libitum</i>       | Energy balance            |                     |                          |                      |
| Fasting TG<br>(mg/dl)           | 0 (n=3/1)                   | 78 ± 16               | 70 ± 15           | 74 ± 15                 | 85 ± 16                   | 10.3 ± 9.2          | Time                     | 0.84 <sup>B</sup>    |
|                                 | 1 (n=2/1)                   | 114 ± 19              | 110 ± 20          | 137 ± 27                | 133 ± 12                  | 21.1 ± 12.1         | MSRF                     | 0.015 <sup>B</sup>   |
|                                 | 2 (n=2/3)                   | 135 ± 13              | 153 ± 22          | 135 ± 20                | 129 ± 24                  | -4.8 ± 14.0         | MSRF×t                   | 0.13 <sup>B</sup>    |
|                                 | 3 (n=2/3)                   | 224 ± 35              | 226 ± 41          | 210 ± 39                | 218 ± 32                  | -3.0 ± 6.3          |                          |                      |
| TG AUC<br>(mg/dl•23h)           | 0 (n=3/1)                   | 425 ± 110             | 1,005 ± 336       | 805 ± 163               | 716 ± 339                 | 118.4 ± 102.5       | Time                     | 0.0023 <sup>B</sup>  |
|                                 | 1 (n=2/1)                   | 842 ± 376             | 1,597 ± 796       | 1,714 ± 786             | 1,610 ± 670               | 114.3 ± 54.5        | MSRF                     | 0.12 <sup>B</sup>    |
|                                 | 2 (n=2/3)                   | 551 ± 160             | 1,174 ± 125       | 1,170 ± 394             | 918 ± 252                 | 75.5 ± 55.3         | MSRF×t                   | 0.36 <sup>B</sup>    |
|                                 | 3 (n=2/3)                   | 1,350 ± 431           | 2,267 ± 379       | 2,398 ± 646             | 1,764 ± 320               | 98.5 ± 55.1         |                          |                      |
| Mean 24-h [TG]<br>(mg/dl)       | 0 (n=3/1)                   | 82 ± 15               | 106 ± 25          | 101 ± 16                | 107 ± 24                  | 30.6 ± 13.2         | Time                     | <0.0001 <sup>B</sup> |
|                                 | 1 (n=2/1)                   | 140 ± 32              | 171 ± 48          | 194 ± 41 <sup>C</sup>   | 191 ± 40 <sup>D</sup>     | 39.3 ± 11.1         | MSRF                     | 0.0099 <sup>B</sup>  |
|                                 | 2 (n=2/3)                   | 151 ± 14              | 176 ± 18          | 165 ± 20                | 159 ± 16                  | 5.6 ± 4.4           | MSRF×t                   | 0.0081 <sup>B</sup>  |
|                                 | 3 (n=2/3)                   | 254 ± 41              | 297 ± 48          | 291 ± 48                | 283 ± 38 <sup>D,F</sup>   | 12.9 ± 4.4          |                          |                      |
| Postprandial TG Peak<br>(mg/dl) | 0 (n=3/1)                   | 103 ± 21              | 173 ± 50          | 149 ± 34                | 153 ± 35                  | 49.8 ± 16.7         | Time                     | <0.0001 <sup>B</sup> |
|                                 | 1 (n=2/1)                   | 190 ± 54              | 237 ± 70          | 309 ± 92                | 298 ± 62 <sup>D</sup>     | 69.8 ± 29.5         | MSRF                     | 0.0080 <sup>B</sup>  |
|                                 | 2 (n=2/3)                   | 177 ± 17              | 268 ± 13          | 251 ± 24                | 221 ± 21 <sup>C</sup>     | 26.3 ± 9.6          | MSRF×t                   | 0.012 <sup>B</sup>   |
|                                 | 3 (n=2/3)                   | 345 ± 48 <sup>F</sup> | 456 ± 71          | 406 ± 74                | 413 ± 47 <sup>D,F</sup>   | 21.6 ± 6.8          |                          |                      |
| Fasting ApoB<br>(mg/dl)         | 0 (n=3/1)                   | 58 ± 4                | 78 ± 11           | 78 ± 12                 | 79 ± 11                   | 35.0 ± 10.7         | Time                     | 0.0001 <sup>B</sup>  |
|                                 | 1 (n=2/1)                   | 88 ± 10               | 106 ± 1           | 117 ± 1                 | 117 ± 7                   | 36.6 ± 17.0         | MSRF                     | 0.42 <sup>B</sup>    |
|                                 | 2 (n=2/3)                   | 80 ± 12               | 91 ± 16           | 92 ± 14                 | 95 ± 9                    | 22.7 ± 6.2          | MSRF×t                   | 0.50 <sup>B</sup>    |
|                                 | 3 (n=2/3)                   | 88 ± 15               | 113 ± 20          | 118 ± 22                | 104 ± 16                  | 19.7 ± 4.2          |                          |                      |
| Fasting sdLDL<br>(mg/dl)        | 0 (n=3/1)                   | 13.5 ± 1.1            | 17.1 ± 3.9        | 20.5 ± 4.8              | 19.3 ± 3.6                | 40.4 ± 18.4         | Time                     | 0.0004 <sup>A</sup>  |
|                                 | 1 (n=2/1)                   | 22.1 ± 4.3            | 24.6 ± 4.6        | 25.6 ± 3.9              | 28.1 ± 6.8                | 29.7 ± 20.6         | MSRF                     | 0.013 <sup>A</sup>   |
|                                 | 2 (n=2/3)                   | 30.2 ± 7.2            | 32.6 ± 8.4        | 27.5 ± 7.6              | 32.0 ± 6.7                | 21.1 ± 17.1         | MSRF×t                   | 0.0018 <sup>A</sup>  |
|                                 | 3 (n=2/3)                   | 29.8 ± 1.4            | 34.3 ± 2.8        | 44.4 ± 3.3 <sup>C</sup> | 54.1 ± 4.1 <sup>E,F</sup> | 81.5 ± 11.7         |                          |                      |
| Postprandial sdLDL<br>(mg/dl)   | 0 (n=3/1)                   | 11.6 ± 2.7            | 10.6 ± 1.5        | 12.5 ± 2.5              | 12.7 ± 3.0                | 11.1 ± 13.0         | Time                     | 0.0057 <sup>A</sup>  |
|                                 | 1 (n=2/1)                   | 14.1 ± 1.9            | 17.4 ± 1.8        | 15.7 ± 1.8              | 14.7 ± 0.8                | 10.6 ± 23.4         | MSRF                     | 0.082 <sup>A</sup>   |
|                                 | 2 (n=2/3)                   | 22.3 ± 5.0            | 22.3 ± 5.4        | 19.5 ± 4.8              | 28.1 ± 7.2                | 21.6 ± 10.1         | MSRF×t                   | 0.029 <sup>A</sup>   |
|                                 | 3 (n=2/3)                   | 25.0 ± 4.2            | 28.2 ± 5.4        | 35.1 ± 6.8 <sup>C</sup> | 34.5 ± 3.9 <sup>C</sup>   | 44.4 ± 10.9         |                          |                      |
| Fasting oxidized LDL<br>(U/L)   | 0 (n=3/1)                   | 39.3 ± 3.3            | 41.9 ± 8.6        | 44.6 ± 6.6              | 43.4 ± 6.0                | 8.9 ± 8.0           | Time                     | 0.0035 <sup>A</sup>  |
|                                 | 1 (n=2/1)                   | 43.3 ± 4.2            | 45.1 ± 4.8        | 47.2 ± 5.2              | 50.8 ± 6.1                | 16.9 ± 3.5          | MSRF                     | 0.33 <sup>A</sup>    |
|                                 | 2 (n=2/3)                   | 60.1 ± 9.8            | 63.1 ± 13.2       | 61.5 ± 11.0             | 66.4 ± 10.7               | 11.2 ± 3.9          | MSRF×t                   | 0.74 <sup>A</sup>    |
|                                 | 3 (n=2/3)                   | 55.3 ± 6.4            | 64.3 ± 7.5        | 61.8 ± 5.7              | 62.7 ± 5.1                | 15.0 ± 5.0          |                          |                      |
| Postprandial RLP-C<br>(mg/dl)   | 0 (n=3/1)                   | 6.3 ± 1.0             | 8.4 ± 1.9         | 9.2 ± 1.5               | 8.0 ± 1.6                 | 26.5 ± 9.3          | Time                     | <0.0001 <sup>B</sup> |
|                                 | 1 (n=2/1)                   | 9.4 ± 2.2             | 12.7 ± 3.4        | 19.0 ± 6.5              | 15.7 ± 2.2 <sup>C</sup>   | 88.7 ± 57.6         | MSRF                     | 0.026 <sup>B</sup>   |
|                                 | 2 (n=2/3)                   | 9.2 ± 1.8             | 12.2 ± 1.1        | 12.2 ± 1.4              | 9.5 ± 0.7                 | 13.0 ± 14.6         | MSRF×t                   | 0.012 <sup>B</sup>   |
|                                 | 3 (n=2/3)                   | 17.2 ± 3.5            | 26.2 ± 5.7        | 24.0 ± 5.9              | 21.3 ± 3.5 <sup>C</sup>   | 27.7 ± 7.3          |                          |                      |
| Postprandial RLP-TG<br>(mg/dl)  | 0 (n=3/1)                   | 35.2 ± 8.9            | 71.5 ± 29.4       | 65.9 ± 20.6             | 66.6 ± 24.3               | 73.9 ± 27.7         | Time                     | <0.0001 <sup>B</sup> |
|                                 | 1 (n=2/1)                   | 80.7 ± 39.0           | 100.6 ± 46.2      | 157.3 ± 74.8            | 147.6 ± 48.0              | 152.3 ± 98.4        | MSRF                     | 0.033 <sup>B</sup>   |
|                                 | 2 (n=2/3)                   | 53.8 ± 8.1            | 96.0 ± 10.0       | 100.4 ± 19.0            | 89.8 ± 17.2               | 70.6 ± 26.8         | MSRF×t                   | 0.16 <sup>B</sup>    |
|                                 | 3 (n=2/3)                   | 150.4 ± 36.1          | 240.1 ± 49.6      | 216.3 ± 64.0            | 205.5 ± 31.4 <sup>C</sup> | 46.1 ± 11.9         |                          |                      |

<sup>A</sup>PROC MIXED 3-factor (time, gender & MSRF) RM ANOVA

<sup>B</sup>PROC MIXED 3-factor (time, gender & MSRF) RM ANOVA with previous day's energy intake (EI) as time-level covariable

<sup>C</sup>P < 0.05, <sup>D</sup>P < 0.01, <sup>E</sup>P < 0.001 vs 0 wk, Tukeys multiple comparison tests<sup>A</sup> on LSmeans adjusted for previous day's EI<sup>B</sup>.

<sup>F</sup>P < 0.05 vs MSRF 0 at corresponding wk, Tukeys multiple comparison tests<sup>A</sup> on LSmeans adjusted for previous day's EI<sup>B</sup>.

Mean ± SEM

**Table S8: Glucose, insulin & indices of insulin sensitivity before and after consumption of glucose- or fructose-sweetened beverages**

| Variable                                                                                               | Sugar (n)                   | Complex Carb<br>0 wk | Sugar<br>2 wk           | Sugar<br>8 wk           | Sugar<br>10 wk             | Factors and<br>Interactions | P value              |
|--------------------------------------------------------------------------------------------------------|-----------------------------|----------------------|-------------------------|-------------------------|----------------------------|-----------------------------|----------------------|
| Preceding diet                                                                                         |                             | Energy balance       | <i>Ad libitum</i>       | <i>Ad libitum</i>       | Energy balance             |                             |                      |
| Fasting Glucose<br>(mg/dl)                                                                             | Glucose (n=15)              | 87.6 ± 1.5           | 88.0 ± 1.9              | 89.8 ± 2.1              | 86.4 ± 1.3                 | Sugar×t                     | <0.0001 <sup>A</sup> |
|                                                                                                        | Fructose (n=17)             | 88.7 ± 1.0           | 95.7 ± 2.1 <sup>C</sup> | 94.6 ± 2.1 <sup>C</sup> | 93.6 ± 1.3 <sup>D</sup>    | Gender×t                    | 0.24 <sup>A</sup>    |
| Fasting Insulin<br>(μU/ml)                                                                             | Glucose (n=15)              | 15.0 ± 1.9           | 15.8 ± 1.6              | 16.4 ± 1.9              | 15.0 ± 1.6                 | Sugar×t                     | 0.27 <sup>A</sup>    |
|                                                                                                        | Fructose (n=17)             | 14.0 ± 1.5           | 17.1 ± 2.0              | 16.3 ± 2.1              | 15.4 ± 1.7                 | Gender×t                    | 0.20 <sup>A</sup>    |
| 3h Oral Glucose Tolerance<br>Test - Glucose AUC<br>(mg/dl•3h)                                          | Glucose (n=15)              | 129.4 ± 16.2         |                         |                         | 157.3 ± 19.6 <sup>G</sup>  | Sugar                       | 0.20 <sup>E</sup>    |
|                                                                                                        | Fructose (n=17)             | 107.7 ± 18.5         |                         |                         | 130.9 ± 17.0 <sup>H</sup>  | Gender                      | 0.87 <sup>E</sup>    |
| 3h Oral Glucose Tolerance<br>Test - Insulin AUC<br>(μU/ml•3h)                                          | Glucose (n=15)              | 232.9 ± 33.0         |                         |                         | 241.7 ± 26.8               | Sugar                       | 0.026 <sup>F</sup>   |
|                                                                                                        | Fructose (n=17)             | 273.1 ± 44.4         |                         |                         | 353.4 ± 65.8 <sup>G</sup>  | Gender                      | 0.35 <sup>F</sup>    |
| Insulin Sensitivity Index<br>mmoles <sup>2</sup> H <sub>2</sub> O/Insulin AUC<br>Insulin AUC: μU/ml•4h | Glucose (n=14) <sup>I</sup> | 0.236 ± 0.036        |                         |                         | 0.210 ± 0.021              | Sugar                       | 0.030 <sup>E</sup>   |
|                                                                                                        | Fructose (n=17)             | 0.254 ± 0.049        |                         |                         | 0.208 ± 0.040 <sup>H</sup> | Gender                      | 0.033 <sup>E</sup>   |
|                                                                                                        |                             |                      |                         | MSRF                    | 0.19 <sup>E</sup>          |                             |                      |

<sup>A</sup>PROC MIXED 4-factor (sugar, time, gender, MSRF) RM ANOVA.

<sup>B</sup>*P* < 0.05, <sup>C</sup>*P* < 0.01, <sup>D</sup>*P* < 0.0001 vs 0 wk, Tukeys multiple comparison tests.

<sup>E</sup>GLM 3-factor (sugar, gender, MSRF) ANOVA on 10 wk vs 0 wk on %difference or <sup>F</sup> difference, 0 vs 10wk.

<sup>G</sup>*P* < 0.05, <sup>H</sup>*P* < 0.01, paired *t* test, 10 wk vs 0 wk.

Mean ± SEM



**Table S9: Effect of MSRF on indices of glucose tolerance/insulin sensitivity during fructose consumption**

| Variable                                                          | MSRF #<br>n=male/<br>female | Complex Carb<br>0 wk | Sugar<br>2 wk     | Sugar<br>8 wk     | Sugar<br>10 wk    | %Δ 10 wk<br>vs 0 wk    | Factor or<br>Interaction | P value             |                     |
|-------------------------------------------------------------------|-----------------------------|----------------------|-------------------|-------------------|-------------------|------------------------|--------------------------|---------------------|---------------------|
| Preceding diet                                                    |                             | Energy balance       | <i>Ad libitum</i> | <i>Ad libitum</i> | Energy<br>balance |                        |                          |                     |                     |
| Fasting Glucose<br>(mg/dl)                                        | 0 (n=3/1)                   | 87.8 ± 0.7           | 90.0 ± 2.2        | 88.5 ± 3.3        | 89.8 ± 1.0        | 2.3 ± 0.8              | Time                     | 0.0003 <sup>A</sup> |                     |
|                                                                   | 1 (n=2/1)                   | 87.3 ± 1.9           | 93.3 ± 5.2        | 92.6 ± 1.0        | 92.5 ± 0.2        | 6.1 ± 2.1              | MSRF                     | 0.51 <sup>A</sup>   |                     |
|                                                                   | 2 (n=2/3)                   | 89.6 ± 2.9           | 97.5 ± 4.9        | 98.3 ± 4.9        | 94.7 ± 3.5        | 5.7 ± 2.1              | MSRF×t                   | 0.56 <sup>A</sup>   |                     |
|                                                                   | 3 (n=2/3)                   | 89.2 ± 1.8           | 99.8 ± 3.8        | 97.1 ± 3.7        | 96.2 ± 1.8        | 7.9 ± 1.7 <sup>D</sup> |                          |                     |                     |
| Fasting Insulin<br>(μU/ml)                                        | 0 (n=3/1)                   | 7.3 ± 1.2            | 7.9 ± 0.6         | 6.6 ± 1.0         | 7.7 ± 1.2         | 8.8 ± 12.0             | Time                     | 0.0065 <sup>A</sup> |                     |
|                                                                   | 1 (n=2/1)                   | 16.4 ± 3.3           | 22.4 ± 4.3        | 21.4 ± 6.1        | 20.6 ± 4.2        | 25.6 ± 8.6             | MSRF                     | 0.0090 <sup>A</sup> |                     |
|                                                                   | 2 (n=2/3)                   | 13.1 ± 2.4           | 13.2 ± 1.5        | 15.4 ± 2.5        | 13.8 ± 2.5        | 5.4 ± 7.5              | MSRF×t                   | 0.063 <sup>A</sup>  |                     |
|                                                                   | 3 (n=2/3)                   | 18.8 ± 2.2           | 25.1 ± 2.7        | 22.0 ± 3.2        | 20.0 ± 2.2        | 6.8 ± 6.0              |                          |                     |                     |
| HOMA-IR                                                           | 0 (n=3/1)                   | 1.6 ± 0.3            | 1.8 ± 0.1         | 1.4 ± 0.2         | 1.7 ± 0.2         | 11.4 ± 12.7            | Time                     | 0.0029 <sup>A</sup> |                     |
|                                                                   | 1 (n=2/1)                   | 3.5 ± 0.6            | 5.2 ± 1.1         | 4.9 ± 1.4         | 4.7 ± 1.0         | 33.5 ± 10.7            | MSRF                     | 0.0042 <sup>A</sup> |                     |
|                                                                   | 2 (n=2/3)                   | 2.9 ± 0.5            | 3.2 ± 0.4         | 3.7 ± 0.6         | 3.2 ± 0.5         | 11.7 ± 9.0             | MSRF×t                   | 0.11 <sup>A</sup>   |                     |
|                                                                   | 3 (n=2/3)                   | 4.1 ± 0.5            | 6.1 ± 0.5         | 5.2 ± 0.7         | 4.7 ± 0.5         | 15.3 ± 6.8             |                          |                     |                     |
| 3h OGTT Glucose AUC<br>(mg/dl•3h)                                 | 0 (n=3/1)                   | 35.1 ± 17.5          |                   |                   |                   | 69.6 ± 21.1            | 148.6 ± 84.4             | Time                | 0.0021 <sup>B</sup> |
|                                                                   | 1 (n=2/1)                   | 71.4 ± 28.8          |                   |                   |                   | 90.9 ± 23.3            | 42.0 ± 18.7              | MSRF                | 0.35 <sup>C</sup>   |
|                                                                   | 2 (n=2/3)                   | 125.4 ± 38.6         |                   |                   |                   | 138.2 ± 34.2           | 40.6 ± 32.9              |                     |                     |
|                                                                   | 3 (n=2/3)                   | 170.0 ± 20.9         |                   |                   |                   | 196.6 ± 15.2           | 20.2 ± 11.6              |                     |                     |
| 3h OGTT Insulin AUC<br>(μU/ml•3h)                                 | 0 (n=3/1)                   | 83.4 ± 11.4          |                   |                   |                   | 100.6 ± 12.4           | 21.6 ± 5.3               | Time                | 0.014 <sup>B</sup>  |
|                                                                   | 1 (n=2/1)                   | 249.9 ± 73.4         |                   |                   |                   | 371.2 ± 186.5          | 32.8 ± 28.1              | MSRF                | 0.17 <sup>D</sup>   |
|                                                                   | 2 (n=2/3)                   | 275.4 ± 71.9         |                   |                   |                   | 339.0 ± 88.8           | 26.5 ± 7.8               |                     |                     |
|                                                                   | 3 (n=2/3)                   | 436.3 ± 77.5         |                   |                   |                   | 559.5 ± 130.0          | 28.0 ± 12.3              |                     |                     |
| OGTDT ISI<br>mmoles <sup>2</sup> H <sub>2</sub> O/<br>insulin AUC | 0 (n=3/1)                   | 0.523 ± 0.093        |                   |                   |                   | 0.443 ± 0.065          | -13.2 ± 6.1              | Time                | 0.0029 <sup>B</sup> |
|                                                                   | 1 (n=2/1)                   | 0.206 ± 0.065        |                   |                   |                   | 0.174 ± 0.063          | -20.2 ± 13.0             | MSRF                | 0.58 <sup>C</sup>   |
|                                                                   | 2 (n=2/3)                   | 0.222 ± 0.069        |                   |                   |                   | 0.170 ± 0.041          | -16.0 ± 8.6              |                     |                     |
|                                                                   | 3 (n=2/3)                   | 0.100 ± 0.018        |                   |                   |                   | 0.080 ± 0.015          | -20.2 ± 6.7              |                     |                     |

<sup>A</sup>PROC MIXED 3-factor (time, gender & MSRF) RM ANOVA.

<sup>B</sup>Paired *t* test, 10 wk vs 0 wk

<sup>C</sup>GLM 2-factor (gender & MSRF) ANOVA on percent difference or <sup>D</sup>difference, 10 wk vs 0 wk.

<sup>D</sup>*P* < 0.05 vs 0 wk, Tukeys multiple comparison tests on LS means.

Mean ± SEM

**Table S10: Effects of gender on lipid and lipoprotein responses during fructose consumption**

| Variable                        | Sugar (n)                | Complex Carb<br>0 wk        | Sugar<br>2 wk                             | Sugar<br>8 wk                                | Sugar<br>10 wk                               | %Δ 10 wk<br>vs 0 wk         | Factor or<br>Interaction   | P value                                                          |
|---------------------------------|--------------------------|-----------------------------|-------------------------------------------|----------------------------------------------|----------------------------------------------|-----------------------------|----------------------------|------------------------------------------------------------------|
| Preceding diet                  |                          | Energy balance              | <i>Ad libitum</i>                         | <i>Ad libitum</i>                            | Energy balance                               |                             |                            |                                                                  |
| Fasting TG<br>(mg/dl)           | Men (n=9)<br>Women (n=8) | 131 ± 21<br>159 ± 30        | 141 ± 26<br>154 ± 33                      | 135 ± 20<br>152 ± 33                         | 145 ± 22<br>145 ± 28                         | 13.4 ± 7.3<br>-6.9 ± 7.0    | Time<br>Gender<br>Genderxt | 0.84 <sup>B</sup><br>0.80 <sup>B</sup><br>0.14 <sup>B</sup>      |
| 23-h TG AUC<br>(mg/dl•23h)      | Men (n=9)<br>Women (n=8) | 709 ± 197<br>919 ± 288      | 1,614 ± 291 <sup>C</sup><br>1,436 ± 343   | 1,761 ± 401 <sup>E</sup><br>1,294 ± 414      | 1,354 ± 280 <sup>D</sup><br>1,115 ± 296      | 128.7 ± 45.0<br>66.0 ± 43.9 | Time<br>Gender<br>Genderxt | 0.0023 <sup>B</sup><br>0.78 <sup>B</sup><br>0.077 <sup>B</sup>   |
| Mean 24-h [TG]<br>(mg/dl)       | Men (n=9)<br>Women (n=8) | 146 ± 23<br>182 ± 36        | 190 ± 28<br>198 ± 43                      | 193 ± 28 <sup>D</sup><br>191 ± 42            | 187 ± 25 <sup>F</sup><br>191 ± 38            | 32.9 ± 5.5<br>4.7 ± 3.9     | Time<br>Gender<br>Genderxt | <0.0001 <sup>B</sup><br>0.83 <sup>B</sup><br>0.0005 <sup>B</sup> |
| Postprandial TG Peak<br>(mg/dl) | Men (n=9)<br>Women (n=8) | 190 ± 33<br>235 ± 48        | 289 ± 39<br>303 ± 68                      | 282 ± 43<br>284 ± 61                         | 282 ± 41 <sup>F</sup><br>267 ± 50            | 58.6 ± 10.6<br>15.0 ± 3.9   | Time<br>Gender<br>Genderxt | <0.0001 <sup>B</sup><br>0.85 <sup>B</sup><br>0.0008 <sup>B</sup> |
| Fasting ApoB<br>(mg/dl)         | Men (n=9)<br>Women (n=8) | 71 ± 4<br>87 ± 12           | 95 ± 5 <sup>C</sup><br>99 ± 17            | 94 ± 7 <sup>C</sup><br>108 ± 17 <sup>C</sup> | 95 ± 6 <sup>D</sup><br>101 ± 12 <sup>C</sup> | 34.0 ± 6.6<br>19.5 ± 4.5    | Time<br>Gender<br>Genderxt | 0.0001 <sup>B</sup><br>0.39 <sup>B</sup><br>0.051 <sup>B</sup>   |
| Postprandial ApoB<br>(mg/dl)    | Men (n=9)<br>Women (n=8) | 68 ± 4<br>81 ± 11           | 91 ± 6 <sup>C</sup><br>94 ± 15            | 92 ± 7 <sup>C</sup><br>99 ± 15 <sup>C</sup>  | 89 ± 7 <sup>E</sup><br>95 ± 13 <sup>C</sup>  | 30.8 ± 7.8<br>18.4 ± 5.2    | Time<br>Gender<br>Genderxt | 0.0006 <sup>B</sup><br>0.41 <sup>B</sup><br>0.23 <sup>B</sup>    |
| Fasting LDL<br>(mg/dl)          | Men (n=9)<br>Women (n=8) | 107.4 ± 7.5<br>124.1 ± 14.8 | 124.0 ± 6.7<br>137.6 ± 19.9               | 125.8 ± 7.3<br>149.6 ± 19.6                  | 123.7 ± 7.8<br>140.3 ± 18.8                  | 16.1 ± 3.3<br>11.5 ± 3.3    | Time<br>Gender<br>Genderxt | 0.0017 <sup>A</sup><br>0.76 <sup>A</sup><br>0.26 <sup>A</sup>    |
| Fasting sdLDL<br>(mg/dl)        | Men (n=9)<br>Women (n=8) | 25.0 ± 3.5<br>24.4 ± 4.5    | 30.2 ± 4.6<br>25.6 ± 4.4                  | 32.3 ± 4.3<br>28.4 ± 5.7                     | 35.1 ± 5.5 <sup>C</sup><br>34.6 ± 6.6        | 43.3 ± 15.1<br>46.8 ± 12.7  | Time<br>Gender<br>Genderxt | 0.0004 <sup>A</sup><br>0.12 <sup>A</sup><br>0.59 <sup>A</sup>    |
| Postprandial sdLDL<br>(mg/dl)   | Men (n=9)<br>Women (n=8) | 17.9 ± 2.3<br>20.4 ± 4.4    | 17.3 ± 2.1<br>24.0 ± 5.1                  | 18.4 ± 2.4<br>25.6 ± 6.3                     | 22.0 ± 4.0<br>26.2 ± 5.4                     | 20.5 ± 9.9<br>27.7 ± 10.2   | Time<br>Gender<br>Genderxt | 0.0057 <sup>A</sup><br>0.85 <sup>A</sup><br>0.10 <sup>A</sup>    |
| Fasting oxidized LDL<br>(U/L)   | Men (n=9)<br>Women (n=8) | 48.1 ± 2.2<br>53.9 ± 8.2    | 52.1 ± 3.2<br>58.8 ± 10.7                 | 52.6 ± 1.8<br>57.9 ± 8.9                     | 54.5 ± 2.5 <sup>C</sup><br>60.2 ± 8.8        | 13.6 ± 2.8<br>11.9 ± 4.7    | Time<br>Gender<br>Genderxt | 0.0035 <sup>A</sup><br>0.97 <sup>A</sup><br>0.99 <sup>A</sup>    |
| Postprandial RLP-TG<br>(mg/dl)  | Men (n=9)<br>Women (n=8) | 77.1 ± 18.5<br>88.7 ± 29.4  | 135.1 ± 25.8 <sup>C</sup><br>131.5 ± 44.1 | 143.0 ± 31.8 <sup>C</sup><br>129.0 ± 45.1    | 135.6 ± 25.8 <sup>E</sup><br>110.1 ± 30.8    | 106.8 ± 31.9<br>46.9 ± 18.0 | Time<br>Gender<br>Genderxt | <0.0001 <sup>B</sup><br>0.58 <sup>B</sup><br>0.11 <sup>B</sup>   |
| Postprandial RLP-C<br>(mg/dl)   | Men (n=9)<br>Women (n=8) | 9.2 ± 1.4<br>12.8 ± 2.9     | 14.6 ± 2.4<br>16.5 ± 4.7                  | 15.9 ± 3.0 <sup>C</sup><br>16.5 ± 4.2        | 13.9 ± 2.0 <sup>E</sup><br>13.5 ± 3.1        | 57.6 ± 18.4<br>7.2 ± 7.1    | Time<br>Gender<br>Genderxt | <0.0001 <sup>B</sup><br>0.56 <sup>B</sup><br>0.014 <sup>B</sup>  |

<sup>A</sup>PROC MIXED 3-factor (time, gender & MSRF) RM ANOVA

<sup>B</sup>PROC MIXED 3-factor (time, gender & MSRF) RM ANOVA with previous day's energy intake (EI) as time-level covariable

<sup>C</sup>P < 0.05, <sup>D</sup>P < 0.01, <sup>E</sup>P < 0.001, <sup>F</sup>P < 0.0001 vs 0 wk, Tukeys multiple comparison tests<sup>A</sup> on LSmeans adjusted for previous day's EI<sup>B</sup>.

Mean ± SEM

**Table S11: Effect of gender on indices of glucose tolerance/insulin sensitivity during fructose consumption**

| Variable                                                          | Sugar (n)   | Complex Carb<br>0 wk | Sugar<br>2 wk             | Sugar<br>8 wk | Sugar<br>10 wk             | %Δ 10 wk<br>vs 0 wk | Factor or<br>Interaction | P value                                |
|-------------------------------------------------------------------|-------------|----------------------|---------------------------|---------------|----------------------------|---------------------|--------------------------|----------------------------------------|
| Preceding diet                                                    |             | Energy balance       | Ad libitum                | Ad libitum    | Energy balance             |                     |                          |                                        |
| Fasting Glucose<br>(mg/dl)                                        | Men (n=9)   | 88 ± 1               | 94 ± 3                    | 93 ± 3        | 92 ± 2 <sup>B</sup>        | 4.3 ± 1.3           | Time                     | 0.0003 <sup>A</sup>                    |
|                                                                   | Women (n=8) | 89 ± 1               | 98 ± 3                    | 97 ± 3        | 95 ± 2 <sup>B</sup>        | 6.4 ± 1.6           | Gender<br>Genderxt       | 0.66 <sup>A</sup><br>0.92 <sup>A</sup> |
| Fasting Insulin<br>(μU/ml)                                        | Men (n=9)   | 12.0 ± 1.6           | 16.4 ± 2.7 <sup>B</sup>   | 13.9 ± 2.1    | 14.3 ± 1.9 <sup>B</sup>    | 20.0 ± 4.4          | Time                     | 0.0065 <sup>A</sup>                    |
|                                                                   | Women (n=8) | 16.3 ± 2.5           | 17.8 ± 3.2                | 19.1 ± 3.7    | 16.6 ± 3.0                 | -0.8 ± 5.5          | Gender<br>Genderxt       | 0.56 <sup>A</sup><br>0.16 <sup>A</sup> |
| 3-h OGTT glucose AUC<br>(mg/dl*3h)                                | Men (n=9)   | 106.5 ± 30.1         |                           |               | 123.6 ± 29.1 <sup>F</sup>  | 60.6 ± 40.5         | Time                     | 0.0021 <sup>C</sup>                    |
|                                                                   | Women (n=8) | 109.1 ± 22.3         |                           |               | 139.0 ± 17.1 <sup>F</sup>  | 59.8 ± 25.4         | Gender                   | 0.72 <sup>D</sup>                      |
| 3-h OGTT insulin AUC<br>(μU/ml*3h)                                | Men (n=9)   | 236.3 ± 58.8         |                           |               | 303.6 ± 99.7               | 20.7 ± 6.9          | Time                     | 0.014 <sup>C</sup>                     |
|                                                                   | Women (n=8) | 314.4 ± 68.3         | 409.5 ± 85.9 <sup>F</sup> | 33.8 ± 9.8    | Gender                     | 0.36 <sup>E</sup>   |                          |                                        |
| OGTDT ISI<br>mmoles <sup>2</sup> H <sub>2</sub> O/<br>Insulin AUC | Men (n=9)   | 0.301 ± 0.078        |                           |               | 0.261 ± 0.063              | -11.7 ± 5.6         | Time                     | 0.0029 <sup>C</sup>                    |
|                                                                   | Women (n=8) | 0.202 ± 0.055        |                           |               | 0.150 ± 0.040 <sup>F</sup> | -23.6 ± 4.4         | Gender                   | 0.082 <sup>D</sup>                     |

<sup>A</sup>PROC MIXED 3-factor (time, gender, MSRF) RM ANOVA.

<sup>B</sup>P < 0.05 vs 0 wk, Tukeys multiple comparison tests.

<sup>C</sup>Paired t test, 10 wk vs 0 wk.

<sup>D</sup>GLM 2-factor (gender & MSRF) ANOVA on % difference or <sup>E</sup>difference, 10 wk vs 0 wk.

<sup>F</sup>P < 0.05, paired t test, 10 wk vs 0 wk.

Mean ± SEM

**Table S12: Energy intake on days prior to 24-h blood collections**

| Sugar/Gender   | n | 0 wk & 10 wk<br>energy<br>requirement &<br>intake (kcal) | 2 wk: %<br>of energy<br>requirement<br>consumed | 8 wk: % of<br>energy<br>requirement<br>consumed | RM ANOVA <sup>A</sup>    |         |
|----------------|---|----------------------------------------------------------|-------------------------------------------------|-------------------------------------------------|--------------------------|---------|
|                |   |                                                          |                                                 |                                                 | Factor &<br>Interactions | P value |
| Glucose/Men    | 7 | 2,584 ± 52                                               | 132.7 ± 12.9                                    | 126.6 ± 6.1                                     | Time (t)                 | <0.0001 |
| Glucose/Women  | 8 | 2,194 ± 83                                               | 110.0 ± 3.3                                     | 109.0 ± 3.1 <sup>C</sup>                        | Sugar×t                  | 0.16    |
| Fructose/Men   | 9 | 2,711 ± 109                                              | 134.1 ± 7.0                                     | 123.3 ± 4.7                                     | Gender×t <sup>B</sup>    | 0.039   |
| Fructose/Women | 8 | 2,197 ± 78                                               | 129.4 ± 9.9                                     | 105.7 ± 8.7                                     | Sugar×Gender×t           | 0.22    |

<sup>A</sup>GLM RM 4-factor (sugar, time, gender, MSRF) ANOVA on percent of energy consumed compared to calculated energy requirement.

<sup>B</sup>GLM RM contrast comparison for effect of gender by wk: 2 wk  $P = 0.082$ ; 8 wk  $P = 0.0059$ .

<sup>C</sup> $P < 0.05$ , unpaired  $t$  test, Glucose/Men vs Glucose/Women.

Mean ± SEM

**Table S13: F statistic and P value on effects of previous day's energy intake -- time-level covariable within 3- & 4-factor RM PROC MIXED Models**

| Variable             | Fructose & Glucose<br>4-factor RM ANOVA |         | Fructose<br>3-factor RM ANOVA |         | Glucose<br>3-factor RM ANOVA |         |
|----------------------|-----------------------------------------|---------|-------------------------------|---------|------------------------------|---------|
|                      | F Statistic                             | P value | F Statistic                   | P value | F Statistic                  | P value |
| Fasting TG           | 0.61                                    | 0.44    | 1.1                           | 0.33    | 3.5                          | 0.090   |
| TG AUC               | 3.0                                     | 0.095   | 4.7                           | 0.051   | 0.7                          | 0.11    |
| Mean 24-h [TG]       | 7.7                                     | 0.010   | 8.3                           | 0.014   | 0.6                          | 0.46    |
| Postprandial TG Peak | 2.5                                     | 0.13    | 3.6                           | 0.082   | 1.1                          | 0.32    |
| Fasting ApoB         | 4.6                                     | 0.041   | 6.4                           | 0.027   | 1.6                          | 0.23    |
| Postprandial ApoB    | 3.6                                     | 0.069   | 9.9                           | 0.008   | 23.2                         | 0.0007  |
| Postprandial RLP-C   | 3.2                                     | 0.084   | 5.5                           | 0.037   | 6.9                          | 0.025   |
| Postprandial RLP-TG  | 2.0                                     | 0.17    | 0.7                           | 0.43    | 6.5                          | 0.029   |

Mean ± SEM

**Table S14: Riboflavin levels in urine collected 2 times/wk during the 8 outpatient weeks as an index of sugar beverage consumption compliance**

|                              | Glucose                                                           | Fructose                |
|------------------------------|-------------------------------------------------------------------|-------------------------|
| Outpatient urine collections | Fold increase in flourescein counts compared with baseline period |                         |
| 1                            | 21.0 ± 8.6                                                        | 12.2 ± 2.0              |
| 2                            | 17.0 ± 3.7                                                        | 14.3 ± 2.4              |
| 3                            | 22.2 ± 6.2                                                        | 18.7 ± 6.7              |
| 4                            | 8.5 ± 2.0                                                         | 14.0 ± 2.8              |
| 5                            | 18.1 ± 4.8                                                        | 12.4 ± 2.1              |
| 6                            | 11.0 ± 3.1                                                        | 13.1 ± 4.1              |
| 7                            | 13.8 ± 4.7                                                        | 13.1 ± 3.4              |
| 8                            | 11.1 ± 3.6                                                        | 12.9 ± 3.0              |
| 9                            | 15.4 ± 4.9                                                        | 10.2 ± 2.5              |
| 10                           | 14.6 ± 5.3                                                        | 11.7 ± 2.7              |
| 11                           | 12.9 ± 4.2                                                        | 12.4 ± 2.7              |
| 12                           | 11.1 ± 4.5                                                        | 11.9 ± 3.2              |
| 13                           | 8.3 ± 2.5                                                         | 8.5 ± 2.3               |
| 14                           | 15.1 ± 4.5                                                        | 14.7 ± 6.5              |
| 15                           | 20.1 ± 13.2                                                       | 9.9 ± 3.9               |
| 16                           | 8.6 ± 2.2                                                         | 10.1 ± 3.0              |
| Mean of 8-wk period          | 14.6 ± 1.3                                                        | 12.4 ± 0.8 <sup>A</sup> |

<sup>A</sup>*P* = 0.16 paired t test, fructose vs glucose

Mean ± SEM

**Table S15: Effect of number of metabolic syndrome risk factors (MSRF) on baseline parameters in all subjects**

| Variable                                                      | MSRF=0        | MSRF=1        | MSRF=2                     | MSRF=3        | P value                                     |
|---------------------------------------------------------------|---------------|---------------|----------------------------|---------------|---------------------------------------------|
| (n=Male/female)                                               | (n=5/3)       | (n=3/2)       | (n=5/5)                    | (n=3/6)       |                                             |
| Fasting TG<br>(mg/dl)                                         | 87 ± 11       | 107 ± 12      | 147 ± 14                   | 216 ± 24      | <0.0001 <sup>A</sup><br>0.0001 <sup>B</sup> |
| TG AUC<br>(mg/dl•23h)                                         | 568 ± 125     | 788 ± 213     | 604 ± 163                  | 1,193 ± 237   | 0.12 <sup>A</sup>                           |
| Mean 24-h [TG]<br>(mg/dl)                                     | 99 ± 18       | 134 ± 19      | 165 ± 18                   | 239 ± 27      | 0.0013 <sup>A</sup><br>0.0001 <sup>B</sup>  |
| Postprandial TG Peak<br>(mg/dl)                               | 120 ± 48      | 173 ± 73      | 193 ± 66                   | 319 ± 105     | 0.0002 <sup>A</sup>                         |
| Fasting LDL<br>(mg/dl)                                        | 101 ± 9       | 129 ± 14      | 123 ± 9                    | 125 ± 9       | 0.28 <sup>A</sup>                           |
| Fasting sdLDL<br>(mg/dl)                                      | 19.0 ± 3.1    | 25.8 ± 3.9    | 31.3 ± 5.4                 | 30.6 ± 2.7    | 0.07 <sup>A</sup>                           |
| Fasting oxidized LDL<br>(U/L)                                 | 45.3 ± 4.3    | 52.5 ± 6.1    | 52.9 ± 5.6                 | 56.5 ± 3.6    | 0.55 <sup>A</sup>                           |
| Postprandial RLP-C<br>(mg/dl)                                 | 6.3 ± 0.7     | 8.8 ± 1.2     | 10.4 ± 1.6                 | 15.3 ± 2.5    | 0.015 <sup>A</sup><br>0.0051 <sup>B</sup>   |
| Postprandial RLP-TG<br>(mg/dl)                                | 37.7 ± 4.6    | 64.8 ± 24.2   | 69.8 ± 12.4                | 126.8 ± 23.4  | 0.012 <sup>A</sup><br>0.0053 <sup>B</sup>   |
| Fasting HDL<br>(mg/dl)                                        | 51 ± 3        | 38 ± 6        | 35 ± 1                     | 36 ± 2        | 0.0001 <sup>A</sup><br>0.028 <sup>C</sup>   |
| Fasting Glucose<br>(mg/dl)                                    | 87.1 ± 1.1    | 86.6 ± 1.3    | 88.0 ± 1.7                 | 93.0 ± 2.2    | 0.071 <sup>A</sup>                          |
| Fasting Insulin<br>(μU/ml)                                    | 10.0 ± 2.0    | 13.3 ± 2.7    | 13.7 ± 1.4                 | 20.0 ± 2.4    | 0.019 <sup>A</sup><br>0.75 <sup>B</sup>     |
| HOMA-IR                                                       | 2.2 ± 0.4     | 2.8 ± 0.6     | 2.9 ± 0.3                  | 4.6 ± 0.6     | 0.018 <sup>A</sup>                          |
| 3-h Glucose OGTT AUC<br>(mg/dl•3h)                            | 68.7 ± 17.7   | 87.8 ± 22.7   | 126.8 ± 23.5               | 168.4 ± 19.2  | 0.0094 <sup>A</sup><br>0.0074 <sup>B</sup>  |
| 3-h Insulin OGTT AUC<br>(μU/ml•3h)                            | 120.1 ± 28.3  | 209.0 ± 47.4  | 250.8 ± 37.8               | 402.5 ± 53.6  | 0.0006 <sup>A</sup><br>0.0002 <sup>B</sup>  |
| OGTDT ISI<br>mmoles <sup>2</sup> H <sub>2</sub> O/Insulin AUC | 0.436 ± 0.066 | 0.219 ± 0.048 | 0.181 ± 0.037 <sup>+</sup> | 0.161 ± 0.037 | 0.0013 <sup>A</sup><br>0.0062 <sup>C</sup>  |

<sup>A</sup>GLM 2-factor (gender and MSRF) ANOVA with trend contrasts for number of MSRF

<sup>B</sup>Linear trend

<sup>C</sup>Quadratic trend

Mean ± SEM
